# Supplementary material for: The Plant Organelles Database 2 (PODB2): An Updated Resource Containing Movie Data of Plant Organelle Dynamics
Source: PubMed Central journal article supplement — Plant Cell Physiol. 2010 Nov 28;52(2):244–53. doi: 10.1093/pcp/pcq184 (PMC3037075; doi:10.1093/pcp/pcq184), 2010-11-28
Supplement: supp_pcq184_Supplemental-legends.pdf [file supp_pcq184_Supplemental-legends.pdf]

**Supplementary Movie 1.** Avoidance movement of chloroplasts in a petiole cell of an adult *Arabidopsis* leaf. Green, actin filaments visualized with GFP-talin; red, chloroplasts. The movie runs 300 times faster than real time. Corresponds to Figure 3A.

**Supplementary Movie 2.** Serial sections showing microfilaments at metaphase during cytokinesis in suspension-cultured tobacco cells. Thirty-four serial images, whose interval was 0.5  $\mu\text{m}$ , were acquired using transgenic tobacco suspension-cultured cells expressing GFP-ABD2. Corresponds to Figure 3B.

**Supplementary Movie 3.** Three-dimensional view of peroxisomes in suspension-cultured tobacco cells. Peroxisomes in suspension-cultured tobacco cells were visualized using the GFP-PTS1 fusion. Eighty-four images were acquired at intervals of 0.45  $\mu\text{m}$ , and used to construct a 3-D view of these cells. Corresponds to Figure 3C.
